# Supplementary material for: Supermolecule density functional calculations on the water exchange of aquated Al(iii) species in aqueous solution
Source: Royal Society of Chemistry journal article supplement (doi:10.1039/b806433d), 2008-01-01
Supplement: b806433d.pdf [file b806433d.pdf]

## Supporting Information

### Supermolecule density functional calculations on the water exchange of aquated Al(III) species in aqueous solution†

Zhaosheng Qian, Hui Feng, Wenjing Yang, Qiang Miao, Lina He and Shuping Bi\*

The structures and the selected structural parameters for the water exchange on  $\text{Al}(\text{H}_2\text{O})_6^{3+}$  and  $\text{Al}(\text{H}_2\text{O})_5(\text{OH})^{2+}$  in the gas-phase reaction system, energies profiles of water exchange on  $\text{Al}(\text{H}_2\text{O})_6^{3+}$  and  $\text{Al}(\text{H}_2\text{O})_5(\text{OH})^{2+}$  for the gas-phase reaction system and supermolecular reaction system in aqueous solution, the technical details of the calculations and Cartesian coordinates of all supermolecular geometries optimized at B3LYP/6-311+G\*\*.

1. Figure S1. Species involved in the water exchange on  $\text{Al}(\text{H}_2\text{O})_6^{3+}$  and  $\text{Al}(\text{H}_2\text{O})_5(\text{OH})^{2+}$  for gas-phase reaction system optimized at B3LYP/6-311+G\*\*

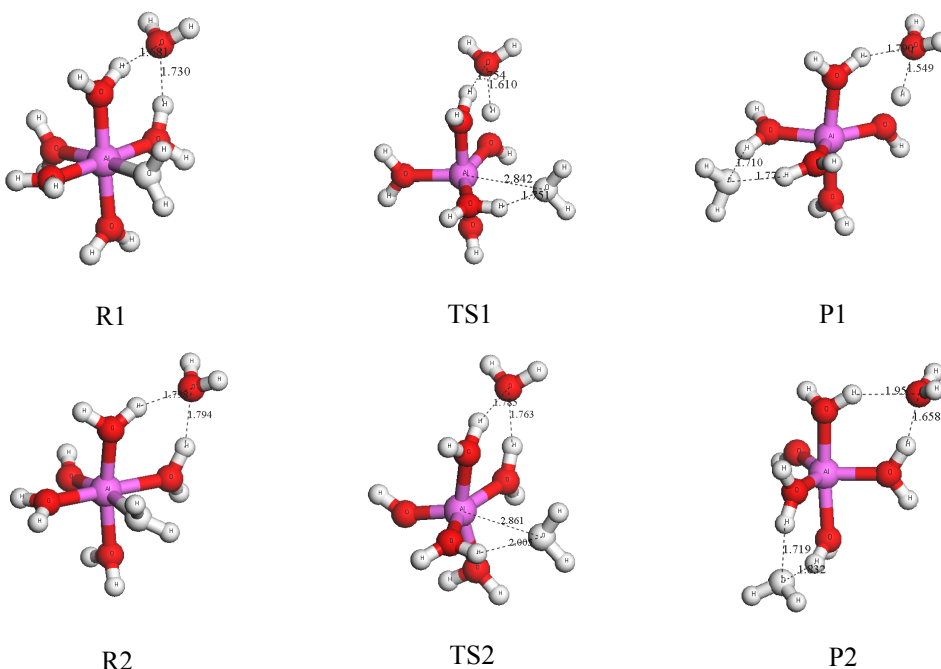

Figure S1. Species involved in the water exchange on  $\text{Al}(\text{H}_2\text{O})_6^{3+}$  and  $\text{Al}(\text{H}_2\text{O})_5(\text{OH})^{2+}$  for gas-phase reaction system optimized at B3LYP/6-311+G\*\*

## 2. The selected structural parameters for the water exchange on $\text{Al}(\text{H}_2\text{O})_6^{3+}$ and $\text{Al}(\text{H}_2\text{O})_5(\text{OH})^{2+}$ in the gas-phase reaction system

**Table S1** Selected Structural Parameters (Å) for the water exchange on  $\text{Al}(\text{H}_2\text{O})_6^{3+}$  and  $\text{Al}(\text{H}_2\text{O})_5(\text{OH})^{2+}$  in the gas-phase reaction system

| complex | $r(\text{Al}-\text{O}_\text{T})$    | $r(\text{Al}-\text{O}_\text{L})$ | $r(\text{H}-\text{O}_\text{L})$ | $r(\text{Al}-\text{O}_\text{I})$ | $\sum r(\text{Al}-\text{O})$ |
|---------|-------------------------------------|----------------------------------|---------------------------------|----------------------------------|------------------------------|
| R1      | 1.956,1.956,1.952,1.948,1.908,1.918 |                                  |                                 | 1.940                            | 15.331                       |
| TS1     | 1.895,1.931,1.869,1.899,1.864       | 2.842                            | 1.751                           | 1.892                            | 15.964                       |
| P1      | 1.903,1.960,1.847,1.866,1.871       | 3.490                            | 1.710,1.773                     | 1.889                            | 16.622                       |
| R2      | 1.728,2.001,1.976,1.976,1.965,1.965 |                                  |                                 | 1.935                            | 15.379                       |
| TS2     | 1.694,1.963,1.914,1.932,1.911       | 2.861                            | 2.005                           | 1.883                            | 16.035                       |
| P2      | 1.687,1.889,1.965,1.883,1.956       | 3.761                            | 1.719,1.832                     | 1.876                            | 16.902                       |

## 3. Energies profiles of water exchange on $\text{Al}(\text{H}_2\text{O})_6^{3+}$ and $\text{Al}(\text{H}_2\text{O})_5(\text{OH})^{2+}$ for the gas-phase reaction system and supermolecular reaction system in aqueous solution

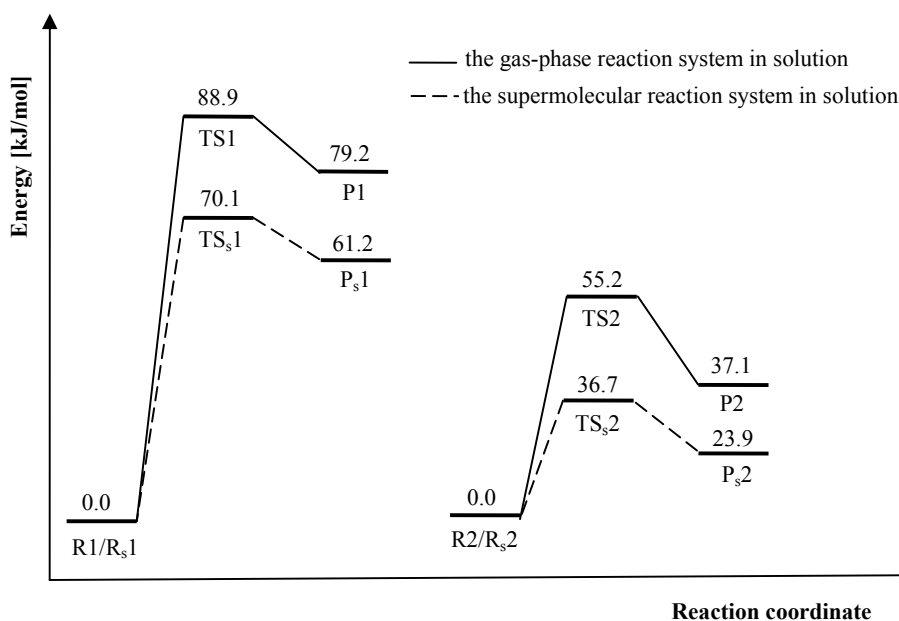

**Figure S2.** Energies profiles for water exchange on  $\text{Al}(\text{H}_2\text{O})_6^{3+}$  and  $\text{Al}(\text{H}_2\text{O})_5(\text{OH})^{2+}$  for the gas-phase reaction system and supermolecular reaction system in aqueous solution

## 4. The technical details of the calculations

### (1) The two models proposed in the present study are defined as follows:

(a) *The gas-phase model.* The gas-phase model in the gas phase did not consider the solvent effect. The energy calculations ( $\Delta E(\text{g})$ ) for the gas-phase model in the gas phase were performing on the

*optimized structures (R1, R2, TS1, TS2, P1 and P2) of the gas-phase reaction system. The gas-phase model in the aqueous solution did not consider the explicit solvent water effect. The energy calculations ( $\Delta E(aq)$ ) for the gas-phase model in the aqueous solution were performing single-point energy calculations with PCM method on the optimized structures (R1, R2, TS1, TS2, P1 and P2) of the gas-phase reaction system.*

*(b) The supermolecular model. The supermolecular model in the gas phase only considers the explicit solvent water effects but does not consider the bulk water effects. The energy calculations ( $\Delta E_s(g)$ ) for the supermolecular model in the gas phase were performing on the optimized structures ( $R_s1$ ,  $R_s2$ ,  $TS_s1$ ,  $TS_s2$ ,  $P_s1$  and  $P_s2$ ) of the supermolecular reaction system. The supermolecular model in aqueous solution not only considers the explicit solvent water effects but also considers the bulk water effects. The energy calculations ( $\Delta E_s(aq)$ ) for the supermolecular model in the aqueous solution were performing single-point energy calculations with PCM method on the optimized structures (R1, R2, TS1, TS2, P1 and P2) of the supermolecular reaction system.*

**(2) The detailed optimization for the reactants, transition states and products in the gas-phase reaction system and supermolecular reaction system.**

*All the structures in the gas-phase reaction system were fully optimized at B3LYP/6-311+G\*\* level, and then for the supermolecular reaction system based on the optimized structures in the gas-phase reaction system the additional six water molecules were added and re-optimized at the same level. For the transition states TS1 and TS2, we found them with TS method using G03 program. For the transition states  $TS_s1$  and  $TS_s2$ , we using the optimized transition states of the gas-phase reaction system, and added additional six water molecules, and then re-optimized with TS method using G03 program. For the products P1 and P2 in the gas-phase reaction system, we used the optimized geometries of the transition states TS1 and TS2 and moved the water leaving molecules far from the center Al atom, and then optimized to products P1 and P2. For the products  $P_s1$  and  $P_s2$  in the supermolecular reaction system, we used the optimized geometries of the products P1 and P2 of gas-phase reaction system and added additional six water molecules, and then optimized to the products  $P_s1$  and  $P_s2$ .*

**5 Cartesian coordinates of all supermolecular geometries optimized at B3LYP/6-311+G\*\***

**R<sub>s</sub>1**

|    |             |             |             |
|----|-------------|-------------|-------------|
| O  | 0.53581900  | 1.73368500  | -0.32472100 |
| O  | -1.18832000 | -1.64002000 | -0.75748800 |
| O  | -1.86095900 | 0.78504900  | 0.13167500  |
| O  | 0.36117600  | -0.62006500 | 1.22712100  |
| O  | 1.39159000  | -0.73321400 | -1.22236600 |
| O  | -0.67580100 | 0.40001300  | -2.39596600 |
| Al | -0.20606800 | 0.00531600  | -0.47320900 |
| H  | -2.17216800 | -1.66171900 | -0.68376500 |
| H  | 0.38964600  | -1.58394300 | 1.40162200  |
| H  | 0.50133600  | -0.11365400 | 2.09578600  |

Supplementary Material (ESI) for Chemical Communications  
This journal is (c) The Royal Society of Chemistry 2008

|   |             |             |             |
|---|-------------|-------------|-------------|
| H | 1.58083400  | -0.65123700 | -2.16648100 |
| H | 2.17106200  | -1.22652400 | -0.79005100 |
| H | -1.08641800 | -0.23015400 | -3.00746300 |
| H | -0.70683100 | 1.27966900  | -2.79993900 |
| H | -1.96263800 | 1.72390800  | 0.41940600  |
| H | -2.72982400 | 0.31993400  | 0.10076500  |
| H | 1.48821800  | 2.04123800  | -0.52286500 |
| H | 0.03026900  | 2.48674000  | 0.05824500  |
| H | -0.82755100 | -2.46304700 | -0.34160900 |
| H | 1.54798400  | 0.85973300  | 3.83671600  |
| O | 0.68603500  | 0.63746800  | 3.45894800  |
| H | 0.09129500  | 0.51876000  | 4.21241500  |
| H | -0.54677700 | -3.93073400 | 1.53767500  |
| O | 0.00123900  | -3.40345400 | 0.93584600  |
| H | 0.74335200  | -3.98345400 | 0.70670300  |
| H | -1.79555000 | 4.12397000  | 0.23624100  |
| O | -1.40848100 | 3.38758300  | 0.73535900  |
| H | -1.37246300 | 3.69859700  | 1.65315700  |
| H | -4.50116000 | -0.94728700 | -0.98640200 |
| O | -3.84530500 | -1.04277200 | -0.27758500 |
| H | -4.33292600 | -1.45070700 | 0.45522800  |
| O | 2.89046400  | 2.61307300  | -0.84648700 |
| H | 3.12153500  | 3.07295300  | -1.66541500 |
| H | 3.54504700  | 2.88902500  | -0.19075800 |
| O | 3.32943500  | -2.14129300 | -0.27457100 |
| H | 4.02928800  | -1.84420200 | 0.32278500  |
| H | 3.73818000  | -2.80541200 | -0.84838300 |

**TS<sub>1</sub>**

|    |             |             |             |
|----|-------------|-------------|-------------|
| O  | 0.62484200  | 1.65384600  | -0.01765100 |
| O  | -1.40361400 | -1.52061700 | -0.39681000 |
| O  | -1.80925100 | 0.92195700  | 0.33949500  |
| O  | 0.51253100  | -0.80503400 | 1.37159600  |
| O  | 0.92070600  | -0.59620800 | -1.45134800 |
| O  | -1.02101500 | 0.52422800  | -2.80698200 |
| Al | -0.23565500 | -0.00992600 | -0.12281500 |
| H  | -2.38546300 | -1.46243200 | -0.33140600 |
| H  | 0.38402100  | -1.77112500 | 1.51375400  |
| H  | 1.08126400  | -0.41729600 | 2.13765900  |
| H  | 0.59858800  | -0.38008600 | -2.34837500 |
| H  | 1.79658500  | -1.13746900 | -1.48328200 |

Supplementary Material (ESI) for Chemical Communications  
This journal is (c) The Royal Society of Chemistry 2008

|                       |             |             |             |
|-----------------------|-------------|-------------|-------------|
| H                     | -1.61109800 | -0.01521900 | -3.35313500 |
| H                     | -0.97054800 | 1.37319400  | -3.26931400 |
| H                     | -1.83798200 | 1.89196400  | 0.55630900  |
| H                     | -2.71877500 | 0.52976200  | 0.31604200  |
| H                     | 1.57878000  | 1.89366900  | -0.30195400 |
| H                     | 0.18316800  | 2.46037800  | 0.32534900  |
| H                     | -1.10963700 | -2.40895900 | -0.08278800 |
| H                     | 2.82518700  | -0.13957400 | 3.44823600  |
| O                     | 1.89984500  | 0.09701500  | 3.29651200  |
| H                     | 1.52601600  | 0.30273000  | 4.16456300  |
| H                     | -0.74735100 | -3.93151600 | 1.78545700  |
| O                     | -0.21898400 | -3.47060300 | 1.11491600  |
| H                     | 0.41004500  | -4.13671200 | 0.79736800  |
| H                     | -1.58846200 | 4.21198200  | 0.29576100  |
| O                     | -1.29282800 | 3.48415100  | 0.86497800  |
| H                     | -1.33956300 | 3.83424000  | 1.76847100  |
| H                     | -4.62538900 | -0.52362200 | -0.65718000 |
| O                     | -3.97708400 | -0.65502800 | 0.05276300  |
| H                     | -4.49638000 | -0.95878700 | 0.81416400  |
| O                     | 2.99938400  | 2.32903100  | -0.68808300 |
| H                     | 3.22122600  | 2.76738400  | -1.52120900 |
| H                     | 3.64866600  | 2.63814600  | -0.04129800 |
| H                     | 3.93428300  | -1.62039800 | -1.50279800 |
| O                     | 3.04014800  | -1.97873200 | -1.58664600 |
| H                     | 3.10888200  | -2.74327000 | -2.17571200 |
| <b>P<sub>5</sub>1</b> |             |             |             |
| O                     | 1.53265900  | -0.74350800 | -0.41760100 |
| O                     | -2.01542700 | 0.53462000  | -0.33965600 |
| O                     | -0.78821700 | -1.55926000 | -1.23143300 |
| O                     | 0.32348200  | 1.61790300  | -0.70409700 |
| O                     | -0.29956000 | -0.33394700 | 1.60033600  |
| O                     | -2.17283000 | 0.42039300  | 3.20196500  |
| Al                    | -0.20788500 | -0.10268500 | -0.20088300 |
| H                     | -2.76352300 | -0.02298000 | -0.65775500 |
| H                     | -0.32559400 | 2.36096500  | -0.75139900 |
| H                     | 1.24476600  | 1.96688200  | -0.93895700 |
| H                     | -1.06118300 | -0.03963200 | 2.20875500  |
| H                     | 0.40924600  | -0.77968200 | 2.18235900  |
| H                     | -2.02890800 | 1.08580100  | 3.88864100  |
| H                     | -2.86889200 | -0.16060000 | 3.53779800  |

Supplementary Material (ESI) for Chemical Communications  
This journal is (c) The Royal Society of Chemistry 2008

|   |             |             |             |
|---|-------------|-------------|-------------|
| H | -0.18056500 | -2.27208200 | -1.57572300 |
| H | -1.73535200 | -1.73020400 | -1.47194000 |
| H | 2.42174300  | -0.33360700 | -0.06910300 |
| H | 1.72344300  | -1.57722800 | -0.89650600 |
| H | -2.25441100 | 1.49259100  | -0.38186000 |
| H | 2.91772700  | 3.46063000  | -0.87421100 |
| O | 2.68365900  | 2.61449100  | -1.28558400 |
| H | 2.94961700  | 2.69985500  | -2.21387100 |
| H | -2.25487600 | 3.63130900  | -1.46528400 |
| O | -1.90572800 | 3.21810800  | -0.65957200 |
| H | -2.08025100 | 3.85751200  | 0.04884100  |
| H | 1.38112000  | -3.99147700 | -1.53245500 |
| O | 1.24558700  | -3.10776900 | -1.90919500 |
| H | 1.54594200  | -3.17367200 | -2.82953000 |
| H | -4.04762400 | -2.08336100 | -1.05273100 |
| O | -3.45993700 | -1.47181400 | -1.52428000 |
| H | -3.87918200 | -1.33441000 | -2.38886700 |
| O | 3.64759100  | 0.33349700  | 0.38605000  |
| H | 4.41110100  | -0.09784400 | 0.79327800  |
| H | 3.96676300  | 1.08608400  | -0.13193300 |
| H | 1.33038700  | -2.33491900 | 3.49546600  |
| O | 1.44848000  | -1.45050000 | 3.12256500  |
| H | 1.96292300  | -0.95273800 | 3.77246500  |

**R<sub>2</sub>**

|    |             |             |             |
|----|-------------|-------------|-------------|
| O  | -1.13322800 | 0.32129100  | 2.34914800  |
| O  | 0.29355600  | -0.53264100 | -1.10494000 |
| O  | 0.47389400  | 1.67643100  | 0.72472900  |
| O  | -1.94039800 | 1.04805200  | -0.21608700 |
| O  | -1.63670200 | -1.51826100 | 0.52623400  |
| O  | 0.94157200  | -0.94490400 | 1.47633200  |
| Al | -0.41070500 | -0.02278300 | 0.43363700  |
| H  | 1.05154800  | -0.12009600 | -1.53236800 |
| H  | -2.71655500 | 0.61433700  | -0.63175300 |
| H  | -1.84513300 | 1.96759100  | -0.53755500 |
| H  | -1.32207900 | -2.27450500 | -0.07408400 |
| H  | -2.56511600 | -1.37775100 | 0.25472800  |
| H  | 1.73868300  | -1.43423300 | 1.12997600  |
| H  | 0.91020400  | -1.02698400 | 2.43620600  |
| H  | 0.12251200  | 2.48201200  | 0.29837100  |
| H  | 1.48465500  | 1.69891800  | 0.63932800  |

Supplementary Material (ESI) for Chemical Communications  
This journal is (c) The Royal Society of Chemistry 2008

|   |             |             |             |
|---|-------------|-------------|-------------|
| H | -1.85556400 | -0.18191200 | 2.74741100  |
| H | -1.06891900 | 1.18028400  | 2.78596800  |
| H | -4.86805800 | -0.57098500 | -0.59982300 |
| O | -3.94726200 | -0.68549500 | -0.87278000 |
| H | -3.97960500 | -1.15595300 | -1.71801700 |
| H | -0.21327800 | -2.23461200 | -1.66954100 |
| O | -0.84382400 | -2.93838900 | -1.40665400 |
| H | -0.53361100 | -3.80147800 | -1.69822000 |
| H | -1.47641400 | 4.37162500  | -0.20250400 |
| O | -1.06974200 | 3.62086200  | -0.65773800 |
| H | -0.81677900 | 3.95472000  | -1.52963100 |
| H | 3.15863300  | 0.98800800  | -3.01750100 |
| O | 3.04083200  | 0.48915900  | -2.19850200 |
| H | 3.56252100  | -0.31537600 | -2.31558000 |
| H | 3.69283800  | 2.24082800  | 0.62384600  |
| O | 3.01108400  | 1.62822800  | 0.32618800  |
| H | 3.23109100  | 1.32772200  | -0.57882800 |
| H | 3.14687100  | -3.22262500 | 0.66350500  |
| O | 3.12612800  | -2.26353100 | 0.76984400  |
| H | 3.97344100  | -2.01978100 | 1.16260300  |

**TS<sub>s</sub>2**

|    |             |             |             |
|----|-------------|-------------|-------------|
| O  | -1.33745000 | 0.09015200  | 2.66862600  |
| O  | 0.55032800  | -0.47909000 | -1.32841200 |
| O  | 0.44074800  | 1.63066400  | 0.67034300  |
| O  | -1.86828500 | 0.97472800  | -0.30149900 |
| O  | -1.46605400 | -1.57281000 | 0.15174000  |
| O  | 0.80460600  | -0.86294500 | 1.46663100  |
| Al | -0.28957600 | -0.05565300 | 0.14017100  |
| H  | 1.31713100  | -0.02156200 | -1.69165500 |
| H  | -2.70733800 | 0.56891200  | -0.61647100 |
| H  | -1.88907900 | 1.95210900  | -0.38616500 |
| H  | -1.13628800 | -2.28435000 | -0.49998300 |
| H  | -2.41906700 | -1.47111000 | -0.02616200 |
| H  | 1.55012700  | -1.52479100 | 1.37393500  |
| H  | 0.44757100  | -0.85796400 | 2.36714000  |
| H  | 0.03566100  | 2.47790800  | 0.40797600  |
| H  | 1.45207600  | 1.73083800  | 0.65059100  |
| H  | -2.03075400 | -0.47879900 | 3.02702500  |
| H  | -1.32855300 | 0.87533100  | 3.23058800  |
| H  | -4.82727600 | -0.60567500 | -0.48842500 |

Supplementary Material (ESI) for Chemical Communications  
This journal is (c) The Royal Society of Chemistry 2008

|   |             |             |             |
|---|-------------|-------------|-------------|
| O | -3.95205600 | -0.65559800 | -0.89711200 |
| H | -4.10030000 | -0.97897700 | -1.79726200 |
| H | 0.08947300  | -2.20316900 | -2.01847400 |
| O | -0.56078600 | -2.89806600 | -1.79327900 |
| H | -0.24682600 | -3.76067200 | -2.08305800 |
| H | -1.74447800 | 4.27695700  | 0.31706100  |
| O | -1.31756600 | 3.64757000  | -0.28104100 |
| H | -1.15590800 | 4.13640400  | -1.10016400 |
| H | 3.26627800  | 1.42273300  | -2.96646000 |
| O | 3.21966700  | 0.83226800  | -2.20295800 |
| H | 3.86516200  | 0.13653500  | -2.38469700 |
| H | 3.63910400  | 2.35103000  | 0.81160600  |
| O | 2.97602700  | 1.79016500  | 0.39486900  |
| H | 3.27148900  | 1.56307200  | -0.50914500 |
| H | 2.68310400  | -3.53987500 | 1.38293600  |
| O | 2.77210900  | -2.57935400 | 1.38089400  |
| H | 3.64289200  | -2.38287300 | 1.74662300  |

**P<sub>2</sub>**

|    |             |             |             |
|----|-------------|-------------|-------------|
| O  | -1.50319800 | -2.79186300 | 2.09710700  |
| O  | -0.45247100 | 1.69519800  | 0.10052800  |
| O  | -1.36612800 | -0.78417600 | -0.74361400 |
| O  | 1.03208200  | -0.59005400 | -1.71293000 |
| O  | 1.97408300  | 0.76928500  | 0.31355800  |
| O  | 0.34720000  | -1.08760800 | 1.27930700  |
| Al | 0.22500500  | 0.11273600  | -0.13343900 |
| H  | -1.37055000 | 1.96532600  | -0.01810700 |
| H  | 1.98432300  | -0.45774400 | -1.94075100 |
| H  | 0.56239300  | -1.12100600 | -2.39648800 |
| H  | 2.01655200  | 1.77177700  | 0.51746200  |
| H  | 2.79544100  | 0.49969800  | -0.12819500 |
| H  | 1.04117900  | -1.04215400 | 1.99528400  |
| H  | -0.36787800 | -1.72396100 | 1.55902300  |
| H  | -1.42129200 | -1.34686400 | -1.53484400 |
| H  | -2.29898500 | -0.52952000 | -0.43270600 |
| H  | -1.36573500 | -3.74222000 | 2.18983700  |
| H  | -2.17912400 | -2.55160400 | 2.74221400  |
| H  | 4.35374300  | -0.76295700 | -1.87233900 |
| O  | 3.67293800  | -0.07619900 | -1.85330100 |
| H  | 4.02301400  | 0.65557600  | -2.38101700 |
| H  | 0.74956000  | 3.17624500  | 0.50064600  |



Supplementary Material (ESI) for Chemical Communications  
This journal is (c) The Royal Society of Chemistry 2008

|   |             |             |             |
|---|-------------|-------------|-------------|
| O | 1.71858800  | 3.25632100  | 0.58310500  |
| H | 1.93477200  | 3.92347500  | 1.24340100  |
| H | -0.61024500 | -2.98575700 | -3.35340000 |
| O | -0.70031500 | -2.03225400 | -3.21674900 |
| H | -1.07017100 | -1.68369300 | -4.04022800 |
| H | -3.61558600 | 3.25983200  | -0.73994000 |
| O | -3.32619800 | 2.72049000  | 0.00775200  |
| H | -3.52879900 | 3.24377300  | 0.79447500  |
| H | -4.51367800 | -0.43792000 | 0.05956900  |
| O | -3.65173600 | -0.00935200 | 0.08991700  |
| H | -3.77981200 | 0.96041500  | 0.06799600  |
| H | 2.62512100  | -1.86774400 | 3.52172600  |
| O | 2.12207300  | -1.09679100 | 3.23422600  |
| H | 2.17536000  | -0.45251500 | 3.94983100  |
